# Supplementary material for: Electrical and Optical Properties of CaTi1−yFeyO3−δ Perovskite Films as Interlayers for Optoelectronic Applications
Source: MDPI journal article supplement (doi:10.3390/ma15196533), 2022-09-21
Supplement: s1 [file s1]

## Supplementary Information

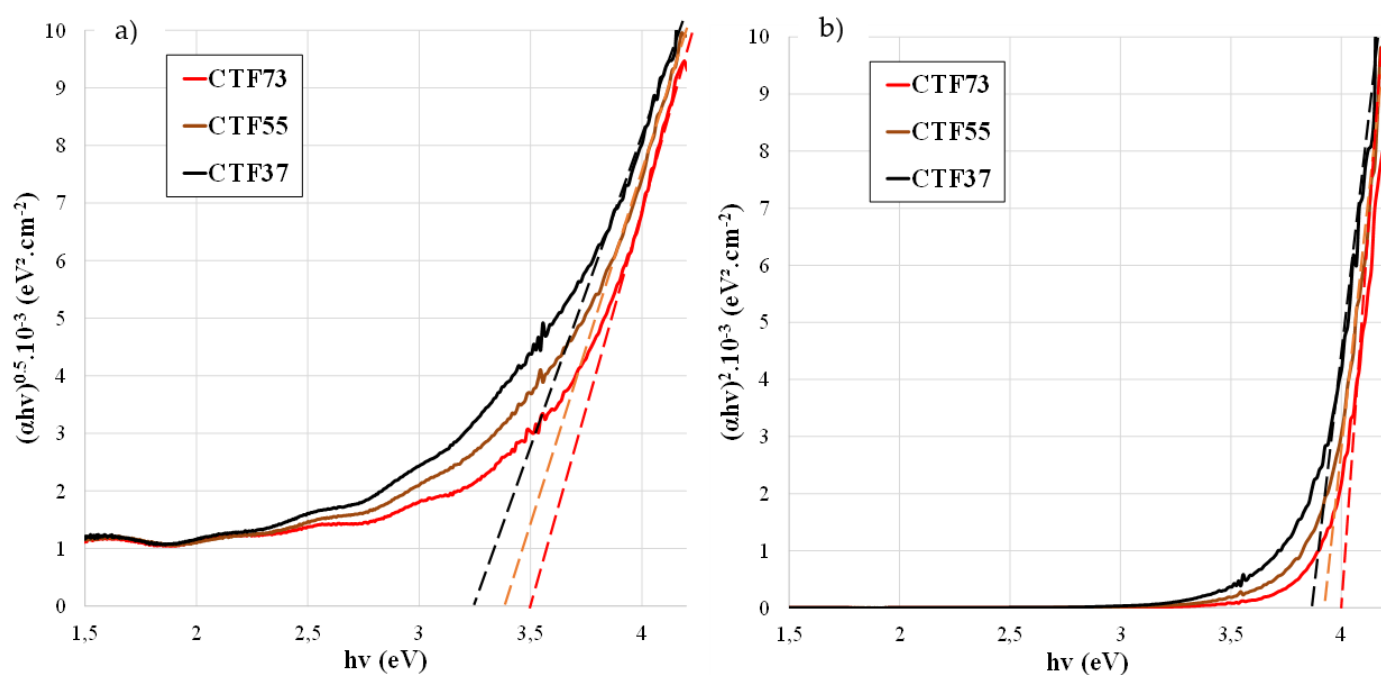

**Figure S1.** Tauc plots (a) with  $r=0.5$ , (b) with  $r=2$ , and associated fits for CTF73, CTF55, and CTF37.

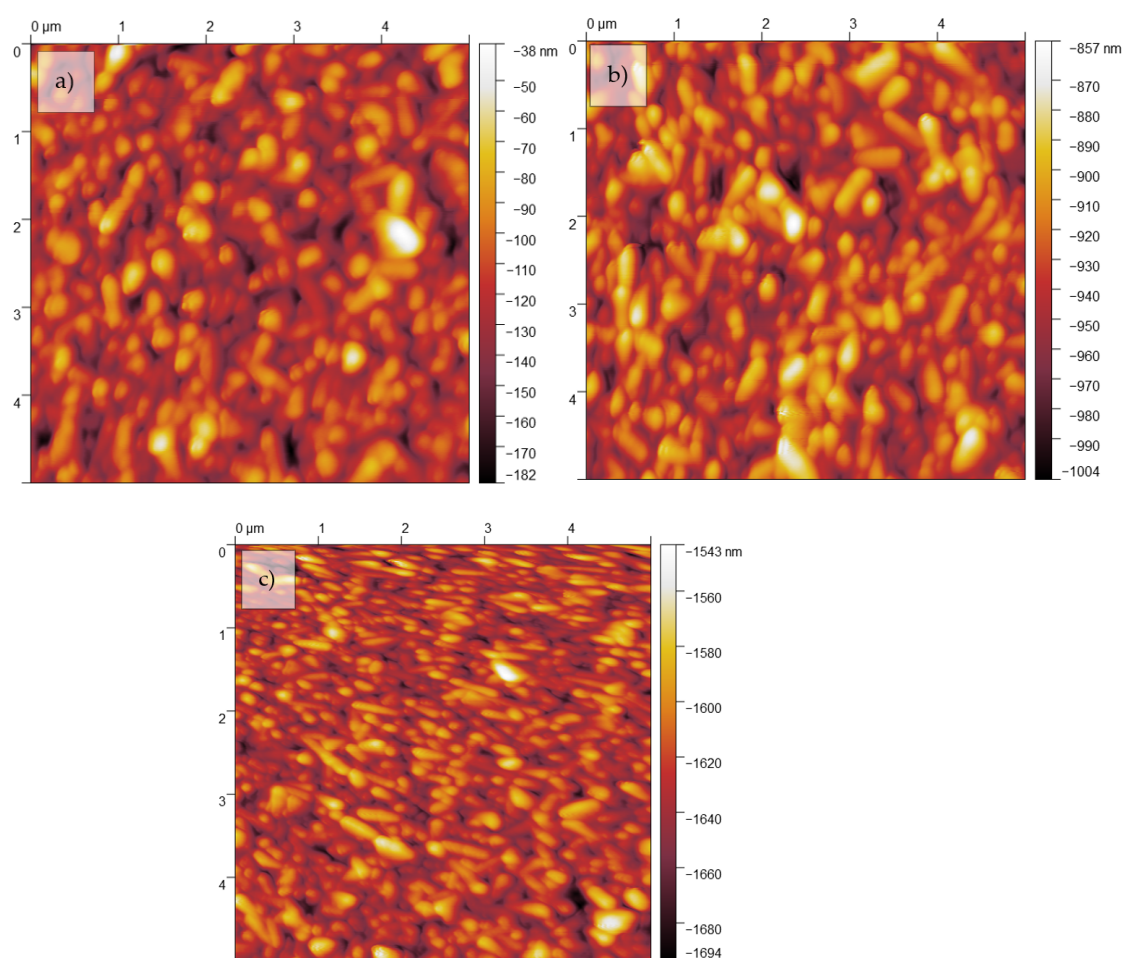

**Figure S2.** AFM topography of (a) CTF37, (b) CTF55, and (c) CTF37 on FTO.

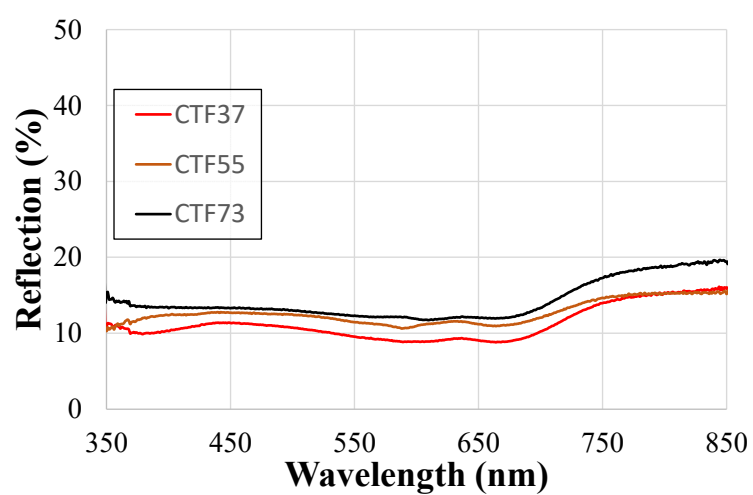

Figure S3. Reflection of CTF layers deposited on sapphire.
